# Supplementary material for: Bandgap-engineered In 2 S 3 quantum dots anchored on oxygen-doped g-C 3 N 4 : forging a dynamic n–n heterojunction for enhanced persulfate activation and degradation of metronidazole
Source: Royal Society of Chemistry journal article supplement (doi:10.1039/d4en00859f), 2024-11-20
Supplement: d4en00859f1.pdf [file d4en00859f1.pdf]

*Electronic Supplementary Information*

**Bandgap-Engineered In<sub>2</sub>S<sub>3</sub> Quantum Dots Anchored on Oxygen-Doped g-C<sub>3</sub>N<sub>4</sub>: Forging a Dynamic n-n Heterojunction for Enhanced Persulfate Activation and Degradation of Metronidazole**

**1. Synthesis of g-C<sub>3</sub>N<sub>4</sub> and O@g-C<sub>3</sub>N<sub>4</sub>**

A facile thermal polymerization method produced pure g-C<sub>3</sub>N<sub>4</sub> using melamine as the precursor. In a perfect world, 5 g of melamine would be burned for 4 hours at a temperature of 550 °C with a ramp rate of 20 °C/min. After allowing the yellow product to cool naturally to room temperature, it was evenly crushed into powder.

Similarly, 1 g of oxalic acid dihydrate and 5 g of melamine were crushed and calcined for 4 hours at the same temperature to create O@g-C<sub>3</sub>N<sub>4</sub>. When the final goods had naturally cooled to room temperature, they were uniformly crushed into powder.

**2. Synthesis of In<sub>2</sub>S<sub>3</sub>**

3 mmol of thioacetamide and 2 mmol of indium chloride tetrahydrate were added to a 100 mL beaker containing 40 mL of distilled water and 10 mL of ethanol. Before being moved to a Teflon container within a stainless-steel autoclave, the solution was stirred for 30 min at 600 rpm in a magnetic stirrer at room pH. The sealed autoclave was maintained at 160 °C in a hot air oven for about 12 hours. The resultant material was centrifuged, thoroughly washed with distilled water, and dried at 65 °C overnight to obtain the required In<sub>2</sub>S<sub>3</sub> nanoparticles.

**3. Characterization details**

Using the PANalytical X'PERT powder X-ray diffractometer, the X-ray diffraction (XRD) spectra of the produced In<sub>2</sub>S<sub>3</sub> nanoparticles, O@g-C<sub>3</sub>N<sub>4</sub>, and In<sub>2</sub>S<sub>3</sub>/O@g-C<sub>3</sub>N<sub>4</sub> nanocomposite were obtained. The surface functional groups of all the produced materials were evaluated

using Fourier transform infrared spectroscopy (FT-IR, Niagoli IS50, USA) over a wavelength range of 500–4000  $\text{cm}^{-1}$ . SAED patterns and high-resolution transmission electron microscopy (HRTEM) pictures were acquired using a JOEL JEM 2100 apparatus. The PHI 5000 Versa Probe III spectrometer recorded the nanocomposite's X-ray photoelectron spectra (XPS). The energy dispersive X-ray (EDX) data and FE-SEM pictures were recorded using an FEI quanta FEG 200 high-resolution scanning electron microscope (SEM). The intermediate products of MDZ degradation were measured using the mass spectra obtained with a Xevo XS QToF mass spectrometer. Using a Hach Dr 6000 UV-Vis spectrophotometer, the ultraviolet-visible diffuse reflectance spectra (UV-DRS) data were collected. The absorbance spectra of the liquid samples were captured using a GENESYS 10S UV-visible spectrophotometer with a 1 cm quartz cell and a scan rate of 600 nm/min.

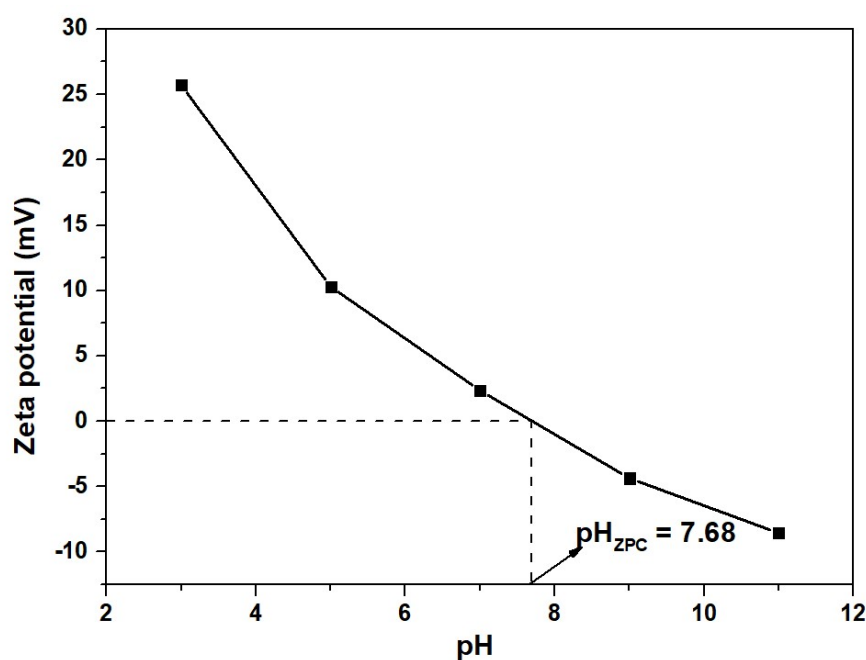

**Supplementary Figure 1:** Zeta potential of  $\text{In}_2\text{S}_3/\text{O}@g\text{-C}_3\text{N}_4$ .

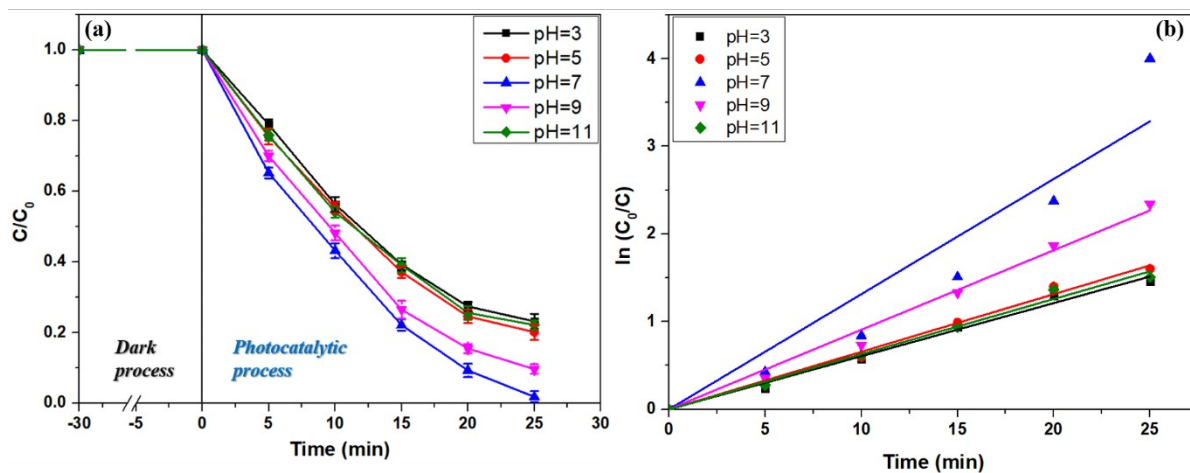

Supplementary Figure 2: a) Degradation profile and b) degradation kinetics for the effect of pH.

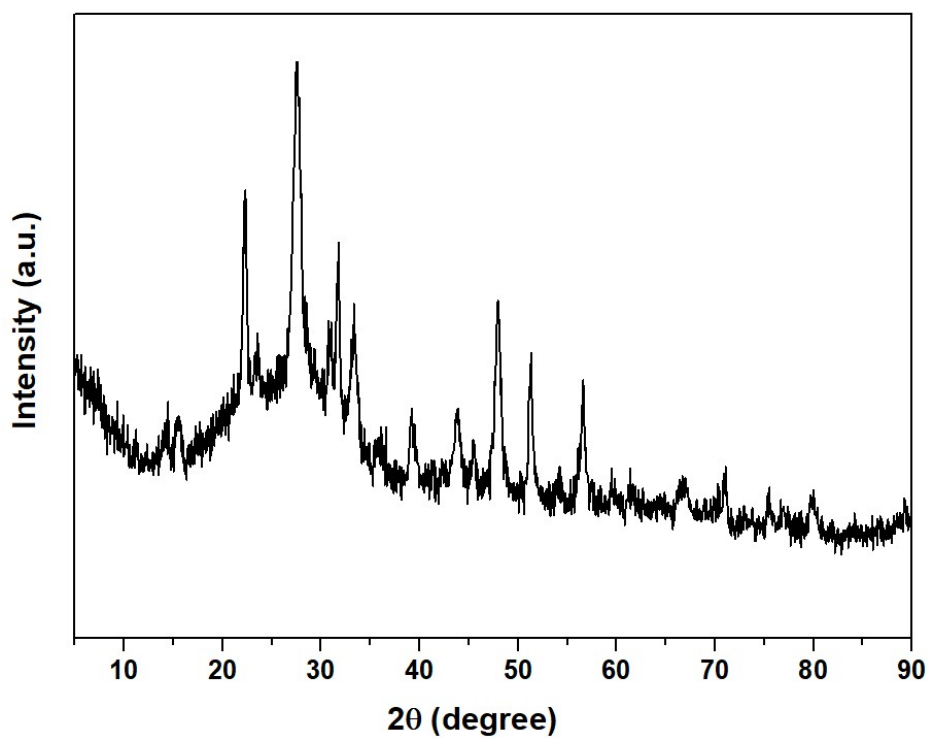

Supplementary Figure 3: XRD analysis of the fabricated material after seven cycles.

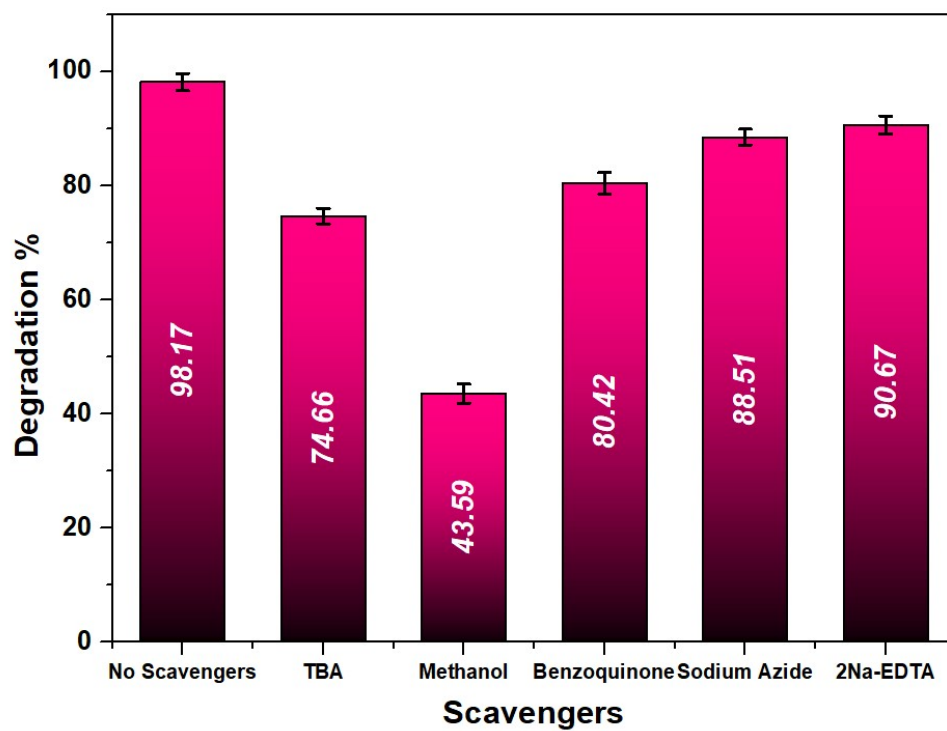

Supplementary Figure 4: Role of scavengers in the degradation of MDZ.
